# Supplementary material for: Accelerating the Global Nested Air Quality Prediction Modeling System(GNAQPMS) model on Intel Xeon Phi processors
Source: Copernicus journal article supplement (doi:10.5194/gmd-2016-307), 2017-02-22
Supplement: Supplementary file [file gmd-2016-307-AC1-supplement.pdf]

**Dear reviewer,**

Thanks a million for your precious time and comments. We will reply the reviewer's comment point-to-point in the following part.

**“The manuscript presents results of efforts to improve the performance and scalability of a global atmospheric chemistry model, the QNAQPMS, using the Knights Landing version of the Intel Xeon Phi. Gains are relative to the original unoptimized code on both KNL and on Broadwell, Intel's latest-generation multi-core Xeon processor. The subject of the work, increasing simulation capability of QNAQPMS using nextgeneration processors to improve computational performance and scaling, represents a noteworthy contribution to modeling science within the scope of Geoscientific Model Development. The contribution comes in the form of new concepts (next generation processors) and methods (measuring performance, identification of bottlenecks, and optimization through restructuring of application code). The approach and methods appear to be valid and reasonable, and the references to related work are appropriate and sufficient.”**

**Reply:** Thanks for the praise from the reviewer. We believe this work could be a good example for the model developer who wants to transplant their model to KNL platform. However, we still need to emphasize that the name of our model is GNAQPMS, not QNAQPMS called by reviewer. To ensure that this name is not coming from our manuscript, we checked our discussion paper and we did not find such name.

**“This reviewer did not evaluate the manuscript with respect to scientific reproducibility. However, the verification of model output from the optimized version appears to be based on merely eyeball comparisons of color contour plots. The lack of a suitable objective verification technique would make it impossible to be sure the results were reproduced.”**

**Reply:** Thanks for the comments. We designed two mechanisms to validate the results. On one hand, we added an extra module to test our results. The function of this module is to output the concentration of specific chemical species after each chemical or physical processes finished. Each process writes its own data into its own files respectively at the same time, and each chemical and physical module would only run one time to insulate the effect of other modules. Then, an additional small program will read the output files from the two version of GNAQPMS to check and report the relative and absolute errors. This method is likes that sampling the

results during the running period. In this way, we can find the main error between each sections. On the other hand, we could plot the spatial distribution of the two model results after a long time integration, and the Figure 5 and Figure 6 with Relative Error (RE) and Relative Mean Square Difference (RMSD). And RE of almost all grids is lower 1%, which is acceptable for us. However, we can't diminish the error currently because of the numerical sensitivity of the advection.

**“Regarding the presentation of the results, the clarity and the level of detail are very poor. There are significant gaps in the explanation of, for example, the analysis of hotspots and bottlenecks in the code, and their relative impacts on performance.**

**The use of VTune is mentioned, but how do the authors determine whether a particular hotspot is performing inadequately, and if so, what is the specific bottleneck? Insufficient use of vectors? Hardware threads? Memory bandwidth or latency? Load imbalance?”**

**Reply:** Thanks for the comments. The reviewer required to present more details about the processes of identifying the bottlenecks and optimization methods. We agreed with the reviewer and we will do the relevant modification in the revised manuscript.

Overall, three steps were used to complete the modernization of model codes: 1) Performance profiling; 2) Single node optimization; 3) Multi nodes optimization.

The bottleneck identification in this study are based on the common way like the Vtune tools as well as the application behavior analysis and characteristic extraction. The Vtune, ITAC as well as advisor tools can identify most of the problems mentioned by the reviewer. The ITAC is mainly used to analyze the MPI performance and communication problems, including the time consuming of the MPI functions and OMP threads. Figure 1 shows the graphic report of the load balance situation of GNAQPMS (using 72 MPI processes), which comes from the ITAC, and it illustrates that the load balance is not the main problem of GNAQPMS.

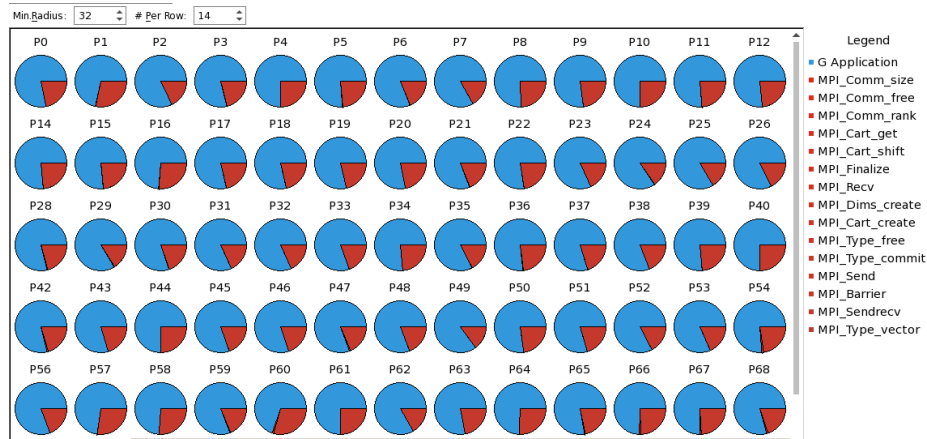

**Figure 1 Load balance situation of GANQPMS on single CPU nodes.**

The Vtune tools currently could only be used on single node, however, it contains more functions to help us to identify the bottleneck. The reviewer mentioned the bandwidth problem, and Vtune could collect the data as well as finish the visualization as showed in Figure 2.

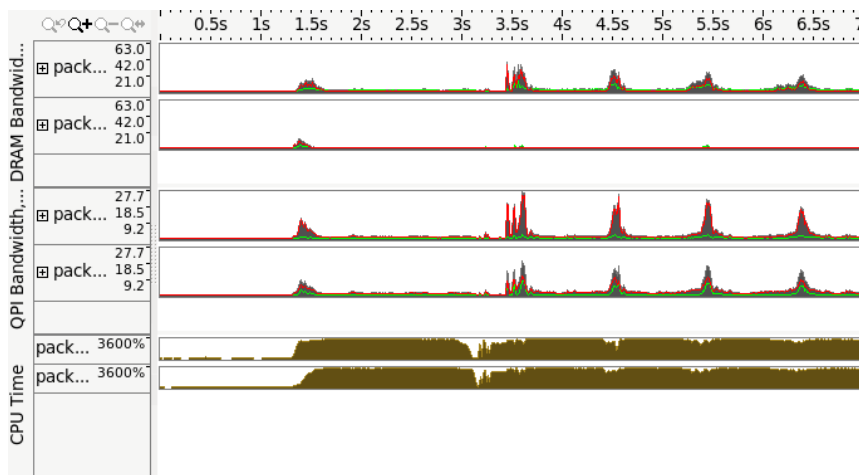

**Figure 2 the bandwidth situation during the application running.**

The Vtune detects the hotspot functions. Figure 3 presents the hotspots in the Base version GNAQPMS detected by Vtune, and the red bar indicates the low CPU usage efficiency. The list of hotspots would clarify the priority of optimization work. Moreover, Figure 4 shows the hotspots in the current version of Opt-V GNAQPMS with better CPU usage efficiency. And the solution for the hotspots depends on the analysis of the codes of the hotspots. The Intel Advisor could help to do the vectorization and multi-threads work. And bandwidth issues could be detected by the Vtune by analyzing the memory-access.

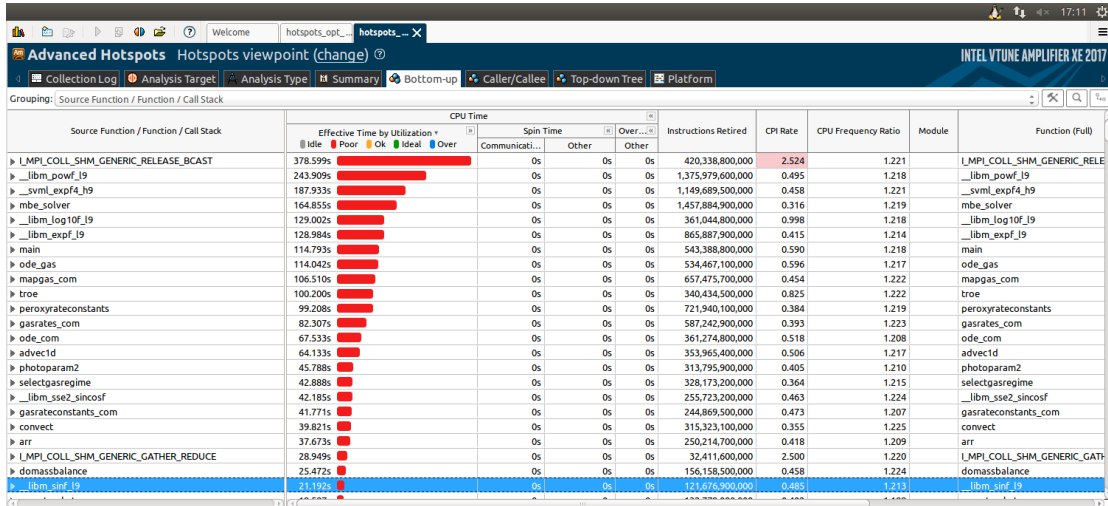

Figure 3 hotspot functions detected by Vtune in Base-V GNAQPMS.

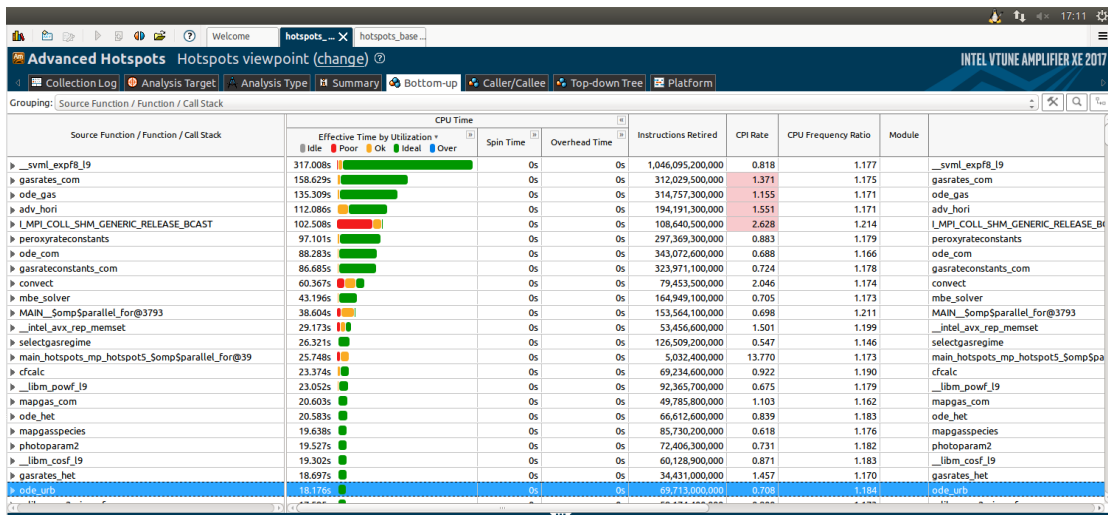

Figure 4 hotspot functions detected by Vtune in Opt-V GNAQPMS

“The use of OpenMP threading is also insufficiently motivated or explained.”

**Reply:** Thanks for the comments. As to OpenMP, our concern is mainly about the following two aspects. On the one hand, our goal is to accelerate the model and improve the scalability, and our primary desire is to replace the MPI processes by the relative cheap OpenMP threads as many as possible on each calculation node, which is adopted in other large-scale models, such as CESM. On the other hand, considering the features of multi-core and low frequency of KNL, the large number of pure MPI processes would lead to expensive communication cost for KNL and it could be inevitable to do the hybrid optimization. And following description is also added to the In Page2 Line 35:

“KNL contains many low frequency cores, and each core contains four hyper threads. Considering the relative expansive overhead of communication of MPI for many cores of KNL, we adopted the hybrid parallel mode by using OpenMP and MPI. Furthermore, the OpenMP threads could fully use the hyperthreads in KNL, and the cheap communication cost of OpenMP could help to improve the scalability”

**“This reviewer also takes issue with including “changing global communication from interface-files writing/reading to MPI functions” among the list of five optimizations discussed, since this change appears to address a fundamental deficiency in the parallel design of the original application, not one specific to optimizing for the Intel Xeon Phi processor. This reviewer suggests removing discussion of this optimization from the paper and using the space to more fully explain the other four optimizations. If, however, the authors wish to include discussion and results of the global communication optimization in this paper, its effect on performance and scaling should be clearly separated from the other optimization results. As currently presented, the reader cannot determine what effect this has relative to the effects of the KNL-specific optimizations.”**

**Reply:** Thanks for the comments. We should declare that none of the optimizations adopted in this paper is specific for the KNL platform. Moreover, performance portability is one of the advantages of KNL. Once the code modernization work is done for KNL, the performance can be easily ported to new generation Intel CPU (e.g. Broadwell, Skylake) sharing hardware features with the same code.

As mentioned by the reviewer, the interface-files could be the problematic for any parallel architecture, but this problem is part of our work to deal with. Moreover, this paper describe the common measures as well as the special measures for our model, and low frequency cores in KNL lead to more I/O overhead on KNL compared with CPU, which is indicated by the effect on speedup of KNL in Table 1(from 3.51 to 3.03). Since the overhead of file I/O increases much faster than that of collective MPI functions as the number of nodes increases, this optimization could be the key to the scalability. However, the Endeavor cluster has updated its nodes configuration, and the benchmark CPU (E-5 2697 V4) nodes have been replaced. Therefore, we could not provide the scalability effects based on the previous test results.

**“Because of these problems, which go beyond language and grammatical issues, this**

**reviewer recommends the paper be rejected and reconsidered only after significant revision.”**

**Reply:** Thanks for your comments. As for the language and grammatical issues, we will invite the native English speaker or some relative company to do the copy editing for English.

According to the reviewer’s specific comments, the following modifications have been done.

- 1. Pages 1 and 2, Introduction. Discussion of impacts is incomplete. What levels of performance does QNAQPMS currently provide for simulation science using the model? What scientific problems are currently possible? What scientific problems are beyond reach with current QNAQPMS performance and scaling. How much more performance. Be specific.**

**Reply:** Thanks for the comments. GNAQPMS is designed for global atmospheric aerosol and chemistry simulation. Its applications include temporal and spatial evolution of atmospheric composition (ozone, black carbon, sulphate, nitrate, dust, seasalt et al.), providing boundary conditions for regional models, intercontinental long-range transport, long-term climate change (aerosol-cloud-radiation interaction), and it also acts as a key component of the Earth System Model of Chinese Academy of Sciences (CAS-ESM). Currently, GNAQPMS can only run on CPU platform, and its parallel scalability and computation speed are about 8 CPU nodes and 46 hours per model year at  $1^\circ \times 1^\circ$  resolution (excluding model I/O). This model performance is suitable for short-term or medium-term (5 years or less) simulation but not suitable for long-term simulation (30 years or more, needs more than 2 months of computation time). Besides, the model computation time will further increase when model I/O is included or higher model resolution (e.g.  $0.25^\circ \times 0.25^\circ$ ) is used. Therefore, it cannot be directly coupled into earth system model and used for long-term climate change simulation. By optimization of model codes and usage of new hardware, we aim to greatly improve the model parallel scalability and computation speed. The target computation speed in the future is about 5-10 model years per day (including model I/O) at  $0.25^\circ \times 0.25^\circ$  resolution. This is an ambitious goal and needs a lot of hard work. We plan to improve the parallel computation speed of GNAQPMS in the first step, and improve the model I/O efficiency in the next step.

The Introduction (the fourth paragraph) of the manuscript was revised accordingly to make the

impact and purpose of this study more specific.

- 2. Page 3, Section 2.1, Model Description of GNAQPMS. (Suggestion) What is the difference between GNAQPMS and NAQPMS? Basing the description of GNAQPMS on the NAQPMS presupposes knowledge about the NAQPMS. There is already a reference to NAQPMS but also add a few sentences of background on the NAQPMS. Explain why the authors focus GNAQPMS and not at the NAQPMS.**

**Reply:** Thanks for the suggestions. The GNAQPMS model is a global multi-scale chemical transport model based on the Nested Air Quality Prediction Modeling System (NAQPMS) (Wang et al., 2006), developed at the Institute of Atmospheric Physics, Chinese Academy of Sciences. NAQPMS is a 3-D regional Eulerian model which has been rigorously evaluated and widely applied to simulate the chemical evolution and transport of ozone (Li et al., 2007; Tang et al., 2010), the distribution and evolution of aerosol and acid rain over East Asia (Wang et al., 2002; Li et al., 2011; Li et al., 2012) and to provide operational air quality forecasts in mega cities such as Beijing, Shanghai and Guangzhou (Wang et al., 2010; Wu et al., 2012; Wang et al., 2009). GNAQPMS and NAQPMS use the similar model framework, physical and chemical parameterization schemes and parallel computation techniques. The optimization achievements in this study could be largely shared between these two models. NAQPMS is mainly used for regional high resolution (e.g. 1-10 km) air pollution simulation and routine air quality prediction. The typical time scale of these applications is several days or months. And the current computation performance of NAQPMS can generally meet the demand of these applications. GNAQPMS is designed for global-scale, long-term atmospheric aerosol and chemistry simulation, and it is also online coupled to the Earth System Model of Chinese Academy of Sciences (CAS-ESM) for study of climate change. These applications have typical time scale of more than 10 years, and raise very high requirements for model computation speed (e.g. 5-10 model years per day). Obviously, there is a large gap between the current computation performance of GNAQPMS and the actual need. Therefore, we choose GNAQPMS to start the code optimization.

A brief description of NAQPMS is added to Section 2.1 in the revised manuscript, and the reason why we focus on GNAQPMS is also given.

- 3. Page 4, line 3: “Since the memory processor is not dominant”. Unclear, explain further: what do the authors mean specifically by “memory pressure”. Memory working set size? Memory bandwidth requirement of this application. How have they determined it is not dominant?**

**Reply:** Thanks for the comments. The memory bandwidth profiling given by VTune shows that the memory bandwidth requirement is far below the peak capability of both CPU and KNL platforms, as shown in Figure 2. In addition, the memory footprint of this workload is about 3G, which can be fully accommodated by the 16GB MCDRAM on KNL. In order to explain clearly, this sentence has been modified as following:

**“Since GNAQPMS is not memory bandwidth bounded, the cache mode is chosen in our experiment.”**

- 4. Page 4, line 9: Spell out first use of TLS to represent thread local storage. It is spelled out in the abstract, but needs to be spelled out again in main body of paper.**

**Reply:** Thanks for suggestion. TLS has been spelled out in the revised paper as following:

**“...reducing Thread Local Storage (TLS) and changing the way of global communication in the GNAQPMS model.”**

- 5. Page 5, paragraph beginning line 6 and all of Section 3.2.1. As noted in the general comments above, the use of files for global communication instead of MPI reductions and gathers is problematic for any modern parallel architecture, not just the KNL. Strongly recommend removing discussion of this optimization, including the entire Section 3.2.1, from the paper. It is relevant to optimizing for KNL.**

**Reply:** Thanks for the precious suggestion. This paper describe the common measures as well as the special measures for our model, and low frequency core in KNL lead to that I/O could have more effect on KNL compared with CPU (Talbe 1). To keep the integrity of our work, we suggest keeping the discussion in section 3.2.1 and separate the contribution of this part for speedup.

And because of the adjustment of the platform for single node testing, we retested the single



node results and showed in Table 1, including the results without the global communication. The results show that the optimal speedup on CPU and KNL are 2.77 and 3.50, respectively. Without the global communication optimization, the speedups drop to 2.69 (CPU) and 3.03 (KNL), respectively (Table 1).

**6. Page 6, line 11. “Cyclic order”? Do the authors mean loop nesting order?**

**Reply:** Thanks for the comments. Yes, it means the loop nesting order. The sentence was revised as following:

“We changed **the nesting order** of loops from **j, i, igas** to **igas, j, i...**”

**7. Page 6, line 12. “We cancelled the calling of the subroutine ... and made it an internal function in main program.” This technique is referred to as inlining. Did the authors look at inlining reports from the Intel compiler to see if this could have been accomplished automatically or with the help of directives and compiler options, without manually restructuring the code? Also, the authors mean to say the "calling subroutine", not the "main program".**

**Reply:** Thanks for the comments. Yes, we’ve tried the “-ipo” option for automatic inlining and checked the compiler report. The report on this subroutine said “Inlining would exceed -inline-max-size value”, which means inlining could not be done by the compiler due to unsatisfied heuristic. Therefore, we have to manually restructure the code at this step, and the calling site happens to be in the main program. According to the reviewer’s comments, we modified the sentence as following:

“**At the second step, since the subroutine `get_ratio_emit()` is too big to be inlined automatically by the Intel compiler, we manually inline it in the calling site of main program, to improve the calling efficiency and facilitate the vectorization.**”

**8. Page 6, line 14. “... using parameters to convert scalar structure to vector structure.” Unclear what "coverting scalar to vector" means, nor does it appear from step 3 Figure 3 that this is what is going on.**

**Reply:** Thanks for the comments. As the reviewer mentioned, this part means the step 3 in “*Fig.*

3” in the manuscript. In this part, we use the parameter arrays to construct the loop to do vectorization calculation. Therefore, we modified this sentence to explain it more clearly:

**“Thirdly, constructive vectorization was involved in the emission section of the model, using the parameter arrays to convert the assignments from scalar structure to loop structure, which got vectorized by the compiler finally, as showed by step three in Fig. 3.”**

**9. Page 6, line 15. “... we added the directives, clauses, declarations and syntax comment of OpenMP outside the outermost loop as shown in box 4.” This sentence appears to be the only discussion in the paper of how and why OpenMP threading was added to the code. Given that this is one of the five optimizations being presented, this is insufficient. It’s not clear why the authors felt it was important to add OpenMP threading nor whether, from the results, it provided a benefit.**

**Reply:** Thanks for the comments. As described in the response for the general comments at the beginning, our concern is mainly about two aspects. On the one hand, our goal is to accelerate the model and improve the scalability, and our primary desire is to replace the MPI processes by the relative cheap OpenMP threads as many as possible on each calculation node, which is also adopted by other large-scale models, such as CESM. On the other hand, considering the features of multi-core and low core frequency of KNL, the large number of pure MPI processes would lead to expensive communication cost for KNL and it could be inevitable to do the hybrid optimization. Currently, our OpenMP optimization did not achieve the primary goals, and the optimal number of threads for KNL and CPU are 6 and 4 (Table 1), respectively. As mentioned in the manuscript, the results we described is our first move and the OpenMP optimization is relatively simple. In the future, we will do more investigation into this part and rebuild the OpenMP code structure.

**10. Page 7, line 15. “2) updating some code segments to the the serial codes to construct vectorization.” What does this mean?**

**Reply:** Thanks for the comments. It refers to construct loop to do the vectorization calculation, which is similar with the step 3 in “*Fig. 3*” in the manuscript. In order to avoid the confusion of this sentence, the original sentence is modified as following:

**“converting the scalar structure to loop structure for compiler vectorization, as showed in step 3 in Fig. 3, but using more complex parameter arrays to build the loop structure;”.**

**11. Page 7, lines 17-25. A reader might make a number of educated guesses about what the authors are saying was the bottleneck and how it was fixed, but it is not clear at all from the text. What codes were "added by the compiler?" Was the issue a copyin/copy-out problem for thread-local variables that were listed as private/firstprivate in the OpenMP directives? If so, how did adding the CBZOBJ argument fix this? By passing-by-reference? If so, how were data races avoided? Were they avoided because the CBMZOBJ objects themselves were THREADPRIVATE? There's a lot of important detail missing from this discussion.**

**Reply:** Thanks for the precious comments. Firstly, please allow us to clarify the performance issue with common variables in OpenMP TLS (Thread Local Storage). The TLS is introduced for variables in named common blocks when using threadprivate OpenMP directive, and allocated for each thread on thread creation. These variables are private to each thread and global within the thread. When a thread references a common variable in its TLS, the memory address of TLS is first located by calling an OpenMP library function with the thread ID, then the common variable is addressed within the TLS space. Even for the references to common variables within the same named common block in the same subroutine, the above process is repeated for every variable, rather than addressing the TLS and common block only once. Since calling the OpenMP library function for TLS addressing is expensive, and there are many references to these common variables in the user subroutines, the total overhead of using common variables in TLS is extremely high. Linking against static OpenMP library can alleviate the calling cost partially but the cost is still unbearable.

Basically, our solution is to construct a derived type (CBMZTYPE) object to eliminate the expensive OpenMP function calling. In the optimized code, the common variables are removed from named common blocks and added to the CBMZTYPE as its members. Using PRIVATE list in the OpenMP directive, each thread owns a private copy of object instance of CBMZTYPE, i.e. the cbmzobj variable. Since the cbmzobj is located on thread local stack, the references to its member variables require only simple relative addressing on stack, with simple yet efficient

instructions. Meanwhile, since the common variables in the original code are no longer global and visible within the user subroutines, a formal parameter (argument) of `cbmzobj` is added to the subroutines using the variables. The additional overhead of passing the address of `cbmzobj` to the subroutine is quite small. Therefore, the cost of referencing common variables in TLS is greatly reduced with the derived type object.

**Now we try to answer the reviewer's questions.**

**Q: What codes were "added by the compiler?"**

**A:** It means the codes of referencing the common variable in TLS, including the calling to OpenMP library function for TLS address, and then accessing the common variable within the TLS space.

**Q: Was the issue a copyin/copy-out problem for thread-local variables that were listed as private/firstprivate in the OpenMP directives?**

**A:** No, it is a reference cost issue, for variables in named common blocks that are listed in the `THREADPRIVATE` directive.

**Q: If so, how did adding the `CBZOBJ` argument fix this? By passing-by-reference? If so, how were data races avoided? Were they avoided because the `CBMZOBJ` objects themselves were `THREADPRIVATE`?**

**A:** The issue is not fixed by adding the `CBMZOBJ` argument, but by constructing the `CBMZOBJ` object to store the variables in the original common blocks. Since the `CBMZOBJ` object is thread private and is on the thread local stack, the references to its members are quite cost efficient.

**12. Page 7, line 32. "...which spent 10 percentages and 8 percentages." One would prefer to see actual timings instead of percentage of runtime in discussion of performance improvement.**

**Reply:** Thanks for the comments. Firstly, we updated the data in Fig. 2 because the previous results came from an old test. And the description of Fig.2 in the manuscript is revised accordingly.

The aim of this part is to emphasize the role of different sections of the time consumption. The impact of the optimization on these sections is showed in Line 3, Page 8, with the speedup.

Upon the comments of the reviewer, we added the walltime as well as the speedup to illustrate the improvement:

**“...According the performance on the single node, the diffusion module can get 1.99X speedup (from 241.97s to 121.19s) on the CPU platform and 3.31X speedup (from 241.97s to 73.05s) on the KNL platform”**

**“...Finally, the optimized wet deposition module got 5.91X speedup (from 498.01s to 84.13s) on the KNL platform, much higher than 3.18X speedup (from 498.01s to 156.13s) on the CPU platform.”**

**13. Page 7, line 36. “1.78 speedup on the CPU platform and 2.39 speedup on the KNL.”**

**How much of these speedups were from the manual vectorization and how much from the optimization of global communication? (Again, this reviewer suggests not considering global communication optimization at all, but if it is discussed, show effects separately from other optimizations).**

**Reply:** Thanks for the comments. As mentioned in the response for specific comment 5 above, we tend to discuss the global communication as part of our work, and we have separated the contribution of this part from the total speedup as required by the reviewer. The optimal speedup on CPU and KNL are 2.77 and 3.50, respectively. Without the global communication optimization, the speedups of same combination of OpenMP and MPI will drop to 2.69 (CPU) and 3.03 (KNL), respectively (Table 1).

**14. Page 8, lines 7-10. “The horizontal resolution of the model is  $1^\circ \times 1^\circ$ , which indicates that the modelling domain contains  $360 \times 180$  grids. And the number of vertical layers is 20, while the time step for integration is 600 seconds in the test case. The test case was designed to test the performance of GNAQPMS on single node of CPU and KNL platform, and multi-nodes on different platform clusters.” This workload is very small and probably not suitable for KNL clusters, which require a high degree of parallelism to be efficient. (The authors make note of this on page 9, lines 32-33). The paper describe a representative workload for scientific simulations using the GNAQPMS and provide some discussion of how the performance results presented**

**are relevant to an actual scientific workload.**

**Reply:** Thanks for the comments. We generally agree with the reviewer. Currently, due to limited HPC resources and poor model computation performance, the typical resolution for global aerosol and chemistry simulation in scientific research is about  $2^\circ \times 2^\circ$ . It makes sure that a several year's model simulation can be accomplished in a month. The test case in this study was chosen based on the following reasons: 1) The configuration with  $1^\circ \times 1^\circ$  horizontal resolution and 600 s integration time step is common in scientific applications. This model configuration has also been used in several previous studies (Chen et al., 2015). By using this configuration, the achievements of this study can be directly applied to actual scientific applications. 2) The test case is a medium-scale workload for global chemistry simulation, which allows us to carry out a lot of debugging and testing. 3) This is the first time to port and optimize GNAQPMS on the KNL platform. A lot of fundamental work is needed to optimize the code and solve potential bugs. Therefore, choosing a medium-scale test case would be a good start.

We agree that a large workload with high model resolution is probably more suitable for KNL clusters, and it might get better parallel scalability. In addition, based on our tests, the bottleneck of MPI global communication and fragmental OpenMP parallel regions are also main reasons for the poor parallel scalability of GNAQPMS on KNL clusters. Global high resolution simulation is a clear trend for the development of chemical transport models. Testing and optimizing GNAQPMS with a super large workload (e.g.  $0.25^\circ \times 0.25^\circ$  or  $0.1^\circ \times 0.1^\circ$ ) will be the next emphasis in the near future.

Further description of the test case is added to Section 4 (the first paragraph) in the revised manuscript.

**15. Page 8, line 15. "The Intel Corporation provides the High Performance Computing environment for the test." Was this Intel's Endeavor cluster? Perhaps mention this as well.**

**Reply:** Thanks for the comments. There are two sets of platforms were used. The single node tests were conducted on **Cthor Lab**. and the cluster tests were done on **Intel Endeavor** cluster. Considering the stability of the test environment, we adopted the machines in **Cthor Lab**. for

the single-node test. According to the suggestion, we have mentioned the names of test environment in the revised manuscript:

**“The Intel Corporation provides the High Performance Computing environment (Cthor Lab. for single node tests and Endeavor Cluster for cluster tests).”**

**16. Page 8, line 20. Opt-V GNAQPMS has been compiled on CPU and KNL platform, respectively.” Not sure what this means. Are the authors actually compiling the codes on the respective platforms? If so, why? Is there some difference expected between a native-compiled and a cross-compiled executable?**

**Reply:** Thanks for the comments. Both native and cross compiling work, and there is no difference between them. Actually, we compiled the same codes with different compiler flags showed in Table 2 on the same CPU platform. In order to avoid such confusion, we modified this part as following:

“...and the Opt-V GNAQPMS has been compiled **for** CPU and KNL platform with the compiler flags showed in Table 2.”

**17. Page 8, line 21. “... the -xCore-AVX2 and -xMIC-AVX512 compile flags were not used for the advection module...” This is troubling and bears further discussion. What did the authors see that caused them to avoid these compiler flags for the advection module? Why is advection susceptible to differences but not other parts of the code such as the ODE solver?**

**Reply:** According to this comment, we can also answered part of comment 18 at the same time. Actually, we designed two mechanisms to verify our results from the two models (Opt-V, Base-V). At first, we added an extra module to test our results. The function of this module is outputting the concentration of specific chemical species after each chemical or physical processes. Each process writes its own data into its own files respectively at the same time, and each chemical and physical module would only run one time to insulate the effect of other modules. Then, an additional small program will read the output files from the two version of GNAQPMS to check and report the relative and absolute errors. This method is likes that sampling the results during the running period. In this way, we can find the main error between

each sections. On the other hand, we could plot the spatial distribution of the two model results after a long time integration, as we did in the paper. And according to the first step, after a serious of test and debugging, we found that the compile flag, such as `-xCore-AVX2` and `-xMIC-AVX512`, would affect the results because of the sensitiveness of calculation accuracy. Although the same `-fp-model` flag would reduce the error raised by advection, the error could not be completely diminished because of numerical sensitivity of advection algorithm. In addition, we did not find the obvious errors caused by the ODE solver in current version codes by the previous methods, since the ODE solver is not as sensitive as the advection section. Generally, there is no obvious difference between the spatial distribution by calculating the Relative Error (Figure 4) and Relative Mean Square Difference (Figure 5), and the white part in the RE columns indicates the error is small enough ( $<1\%$ ).

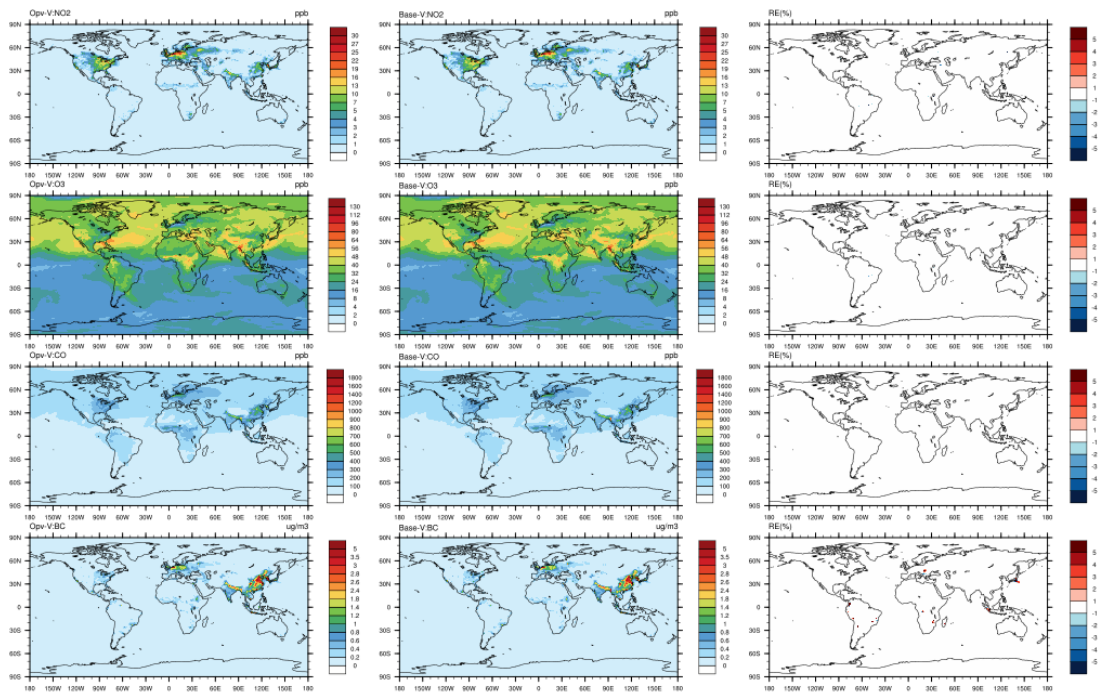

**Figure 5. The Relative Error between the results of Base-V and Opt-V GNAQPMS.**



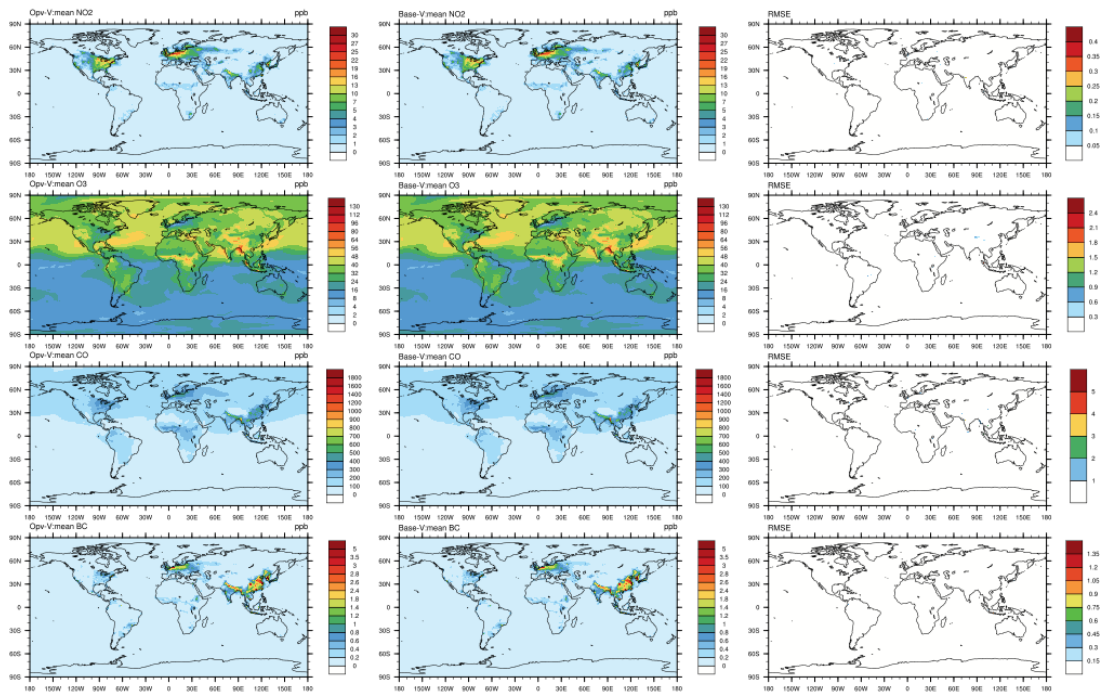

**Figure 6. The Relative Mean Square Difference between the results of Base-V and Opt-V GNAQPMS.**

**18. Page 9, line 2. “...were confirmed to be identical.” This is not a persuasive verification method. An eyeball comparison of plots would not be considered sufficient to confirm that results are identical. Provide difference plots and RMS difference statistics. Page 9, line 20. “...when the computing scale is fixed.” Right word? Instead maybe workload? problem size?**

**Reply:** Thanks for your kind comments. The answer for validation of model results has been given in the above section, Question 17.

According to the suggestion, the Page9, line 20 is modified to explain more suitable:

**“...when the workload is fixed”.**

**19. Page 9, line 24. “After optimization, the parallel scalability of GNAQPMS is greatly improved...” This seems counterintuitive, since vectorization and other node-performance optimizations that improve performance on each node from should make the code less well, assuming that interprocessor communication overheads are**

**the same. It's important to distinguish here (1) what parts of the code are being timed for the scaling measurements. (2) Which optimizations are contributing to the improved scalability and which may be improving performance but working against strong scaling.**

**Reply:** Thanks for your comments. As mentioned in Section 3.2, the optimizations include global communication optimization that replaces interface-files writing/reading with collective MPI functions. This optimization reduces the communication overhead greatly, since the overhead of file I/O increases much faster than that of collective MPI functions as the number of nodes increases. For the optimized code, since the communication improvement is much more than that of the computation part, we observe a great improvement in parallel scalability. To (1) question, we evaluate the run time for “the core calculation portion of the model”, as mentioned in Page 9, lin23.

To (2) question, with respect to reviewer's classification, we would declare that the global communication optimization contributes to the scalability improvement, and other optimizations mainly contribute to the computation improvement. But we would like to further point out that single-node optimization does not necessarily work against strong scaling. There are at least two exceptions. One is the OpenMP parallelization that could hide the latency of MPI point-to-point communication partially or fully. In some cases, it can help improve the single-node performance as well as the cluster scalability. Another is the CA-KSMs (Communication-Avoiding Krylov Subspace Methods) developed by Professor Demmel at Berkeley, at algorithmic level, which optimize the global communication and expose the opportunity for local computation optimization at the same time.

**20. Page 9, line 33. “... OpenMP code segments on KNL...” What is the effect of varying the number of OpenMP threads with respect to MPI tasks? That is, using the same overall number of hardware threads across the job? What is the effect of running pure MPI? Pure OpenMP?**

**Reply:** Thanks for your kind comments. Firstly, we unfortunately found that single node test environment (Cthor Lab.) had some adjustment of the machines, which lead to the difference of the test results. Therefore, we retested all the results and updated the data in the revised

manuscript. As suggested by the reviewer, we tested the combination of different OpenMP threads and MPI processes (Table 1). All tests are fully using the hardware threads. The results indicate that the best combination on CPU platform is 6 OpenMP with 12 MPI processors. For KNL, we used the command line “-env I\_PIN\_MPI\_DOMAIN=N” to pin the MPI processes to specific cores. Moreover, the combination of 4 OpenMP and 34 MPI processes could get the optimal speedup (3.509, which is 3.34 in the original manuscript).

**Table 1 the speedup and walltime of different combination of OpenMP threads and MPI processes.**

| <b>CPU (E5-2697 V4 with 36 physical cores and 2 hyperthreads)</b> |          |           |               |              |
|-------------------------------------------------------------------|----------|-----------|---------------|--------------|
|                                                                   | OMP      | MPI       | WALLTIME      | SPEEDUP      |
| Baseline (No HyperThread)                                         | 0        | 36        | 4381.2        | 1            |
| Opt-V                                                             | 1        | 72        | 1769          | 2.477        |
|                                                                   | 2        | 36        | 1625.72       | 2.695        |
|                                                                   | 4        | 18        | 1614.9        | 2.713        |
|                                                                   | <b>6</b> | <b>12</b> | <b>1580.1</b> | <b>2.773</b> |
|                                                                   | 12       | 6         | 1612.3        | 2.717        |
|                                                                   | 18       | 4         | 1790.2        | 2.447        |
|                                                                   | 36       | 2         | 2243.4        | 1.952        |
| Opt-V(No global communication)                                    | <b>6</b> | <b>12</b> | <b>1623.6</b> | <b>2.698</b> |
| <b>KNL(KNL 7250 with 68 physical cores and 4 threads)</b>         |          |           |               |              |
| Opt-V                                                             | 2        | 136       | 1499.2        | 2.922        |
|                                                                   | 4        | 68        | 1402.9        | 3.12         |
|                                                                   | 2        | 68        | 1512.8        | 2.896        |
|                                                                   | <b>4</b> | <b>34</b> | <b>1248.3</b> | <b>3.509</b> |
|                                                                   | 8        | 34        | 1373.6        | 3.189        |
|                                                                   | 16       | 17        | 1473.2        | 2.974        |

|                                |   |    |        |       |
|--------------------------------|---|----|--------|-------|
| Opt-V(No global communication) | 4 | 34 | 1444.6 | 3.032 |
|--------------------------------|---|----|--------|-------|

**21. Page 10, Conclusion section. Future work and areas for improvement are discussed. However the conclusion should also include discussion of what levels of performance and scaling are needed for simulation science using GNAQPMS. The conclusion should assess whether and how well the presented work helps the GNAQPMS users achieve these goals.**

**Reply:** Thanks for the comments. We agree with the reviewer. The levels of performance and scaling needed for simulation science using GNAQPMS has been discussed in the response of Question One. For short-term or medium-term simulations (5 years or less), the model computation speed needed is about 1 model year per day (including model I/O), while it should be increased to about 5 model years per day for long-term (30 years or more) high resolution simulations (e.g. 0.25°x0.25°). Improve single node computation speed and parallel scalability is the way to achieve the above goals. As shown in the conclusion, the single node computation speed and parallel scalability of GNAQPMS were significantly improved after code optimization. The computation speed (excluding model I/O) has been improved from about 0.5 model year per day using 8 CPU nodes to about 3.7 model year per day using 30 KNL nodes and about 8 model year per day using 40 CPU nodes, respectively. Therefore, without regard to the model I/O, the optimization work in this study has made the computation performance of GNAQPMS very close to our anticipated goal. In the next step, further work will be focused on solving problems concerning OpenMP parallel regions and global communication on KNL platform and conducting analysis and optimization of model I/O.

Further discussion of the model computation performance needed now and in the future is added to Section 5 (the second paragraph) in the revised manuscript:

**“In summary, the computation speed (excluding model I/O) has been improved from about 0.5 model year per day using 8 CPU nodes to about 3.7 model year per day using 30 KNL nodes and about 8 model year per day using 40 CPU nodes, respectively. Therefore, without regard to the model I/O, the optimization work in this study has made the computation performance of GNAQPMS very close to our anticipated goal. In the next step, further work will be focused on merging OpenMP parallel regions.”**

22. **Figure 7. Shows speedup but not performance. Suggest adding a figure that shows performance as a function of the number of nodes. Plot as simulation seconds per second of wall clock time.**

**Reply:** Thanks for your kind comments. We added the following figure that shows the performance as a function of the number of nodes, and this figure will be added into the supplementary material:

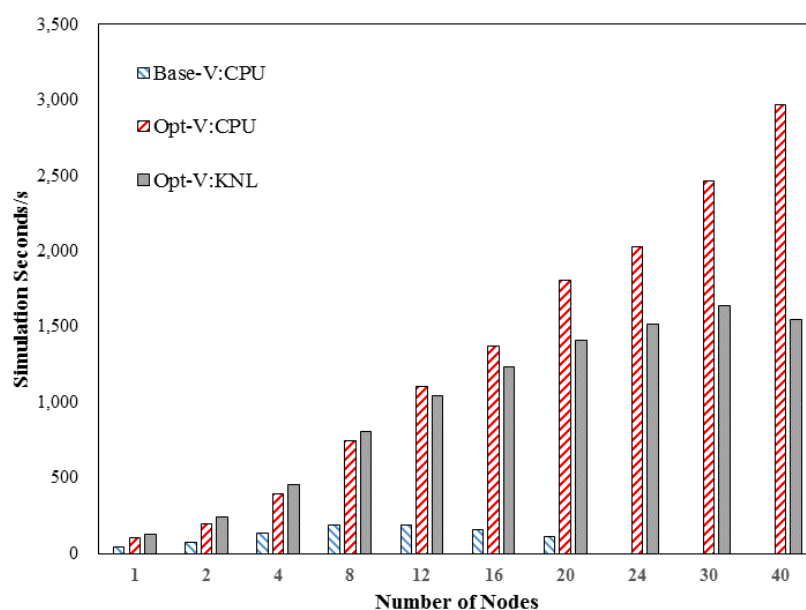

**Figure 7 the performance ability with increasing of number of nodes**

### References:

- Chen, H. S., Wang, Z. F., Li, J., Tang, X., Ge, B. Z., Wu, X. L., Wild, O., and Carmichael, G. R.: GNAQPMS-Hg v1.0, a global nested atmospheric mercury transport model: model description, evaluation and application to trans-boundary transport of Chinese anthropogenic emissions, *Geosci. Model. Dev.*, 8, 2857-2876, doi:10.5194/gmd-8-2857-2015, 2015.
- Li, J., Wang, Z., Akimoto, H., Gao, C., Pochanart, P., and Wang, X.: Modeling study of ozone seasonal cycle in lower troposphere over east Asia, *J. Geophys. Res.-Atmos.*, 112, D22s25, doi:10.1029/2006jd008209, 2007.
- Li, J., Wang, Z., Wang, X., Yamaji, K., Takigawa, M., Kanaya, Y., Pochanart, P., Liu, Y., Irie, H., Hu, B., Tanimoto, H., and Akimoto, H.: Impacts of aerosols on summertime tropospheric

- photolysis frequencies and photochemistry over Central Eastern China, *Atmos. Environ.*, 45, 1817-1829, doi:10.1016/j.atmosenv.2011.01.016, 2011.
- Li, J., Wang, Z., Zhuang, G., Luo, G., Sun, Y., and Wang, Q.: Mixing of Asian mineral dust with anthropogenic pollutants over East Asia: a model case study of a super-duststorm in March 2010, *Atmos. Chem. Phys.*, 12, 7591-7607, doi:10.5194/acp-12-7591-2012, 2012.
- Tang, X., Wang, Z., Zhu, J., Gbaguidi, A. E., Wu, Q., Li, J., and Zhu, T.: Sensitivity of ozone to precursor emissions in urban Beijing with a Monte Carlo scheme, *Atmos. Environ.*, 44, 3833-3842, doi:http://dx.doi.org/10.1016/j.atmosenv.2010.06.026, 2010.
- Wang, Q., Fu, Q., Wang, Z., Wang, T., Liu, P., Lu, T., Duan, Y., and Huang, Y.: Application of ensemble numerical model system on the air quality forecast in Shanghai (in Chinese), *Environmental Monitoring and Forewarning*, 2(4), 1-6+11, 2010.
- Wang, Z., Akimoto, H., and Uno, I.: Neutralization of soil aerosol and its impact on the distribution of acid rain over east Asia: Observations and model results, *J. Geophys. Res.-Atmos.*, 107, 4389, doi:10.1029/2001jd001040, 2002.
- Wang, Z., Xie, F., Wang, X., An, J., and Zhu, J.: Development and application of Nested Air Quality Prediction Modeling System (in Chinese), *Chinese Journal of Atmospheric Sciences*, 30(5), 778-790, 2006.
- Wang, Z., Wu, Q., Gbaguidi, A., Yan, P., Zhang, W., Wang, W., and Tang, X.: Ensemble air quality multi-model forecast system for Beijing (EMS-Beijing): Model description and preliminary application (in Chinese), *Journal of Nanjing University of Information Science & Technology (Natural Science Edition)*, 1(1), 19-26, 2009.
- Wu, Q., Wang, Z., Chen, H., Zhou, W., and Wenig, M.: An evaluation of air quality modeling over the Pearl River Delta during November 2006, *Meteorol. Atmos. Phys.*, 116, 113-132, doi:10.1007/s00703-011-0179-z, 2012.
